# Supplementary material for: Effect of Moderate Consumption of Different Phenolic-Content Beers on the Human Gut Microbiota Composition: A Randomized Crossover Trial
Source: MDPI journal article supplement (doi:10.3390/antiox11040696), 2022-03-31

Supplemental Figure S1. Taxa that significantly changed between each intervention period with respect to the washout period (baseline) at different taxonomic levels: phylum, family and genus (DesSeq2 test;  $p < 0.05$ ). Values are presented as mean  $\pm$ SD (standard deviation). a) Dark beer period; b) Lager beer period; c) without alcohol beer period.

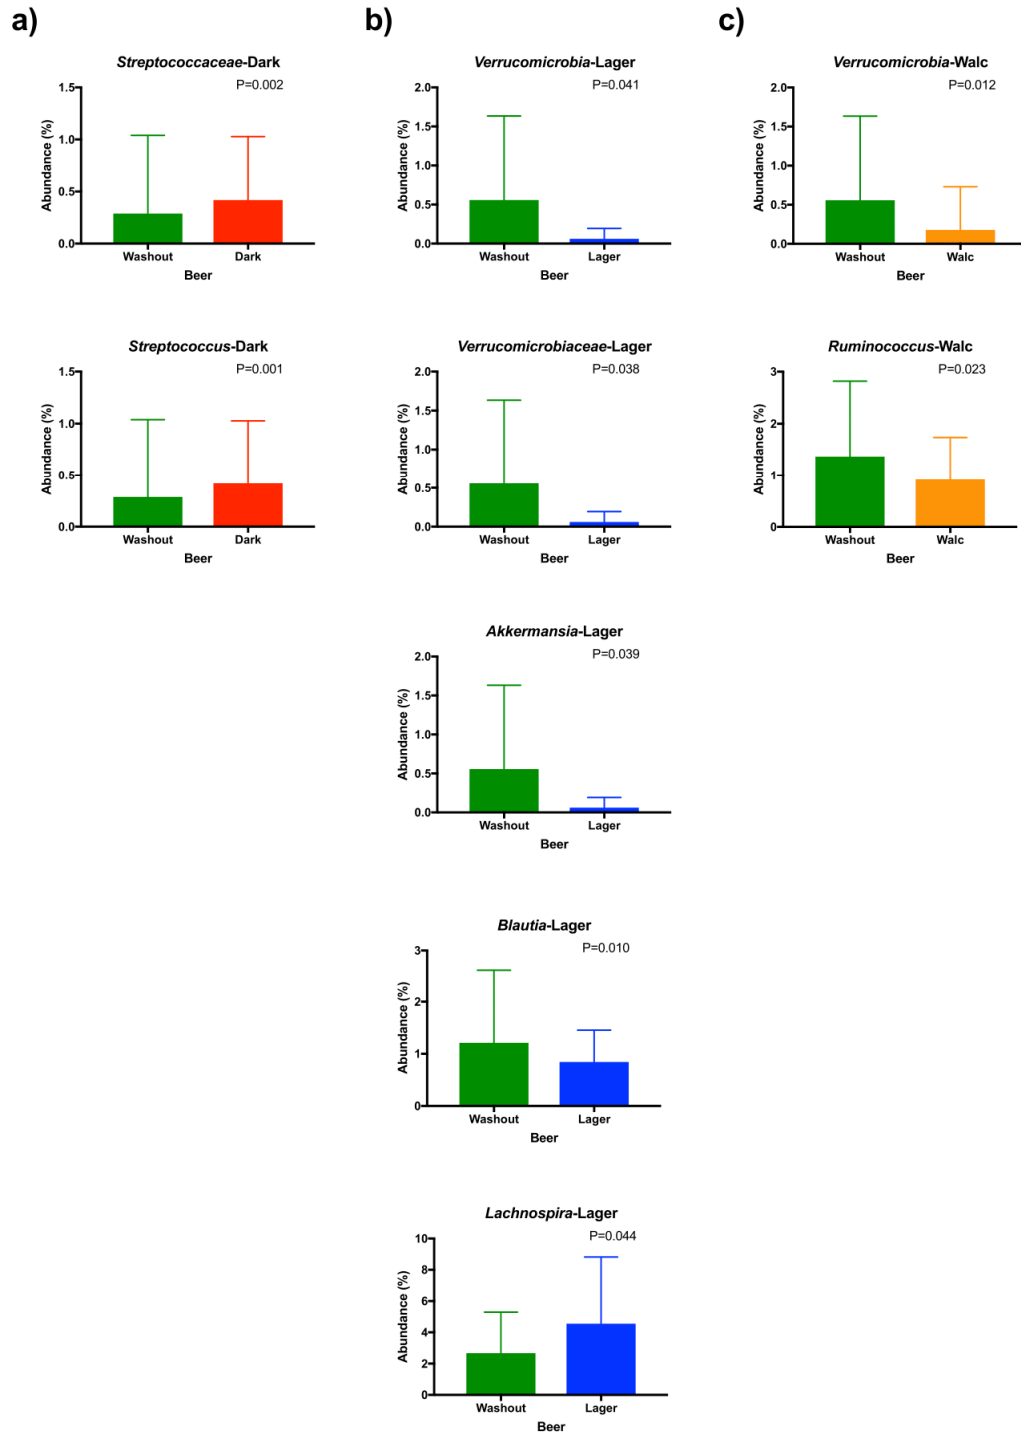

Supplement: s1 [file s1]
