# Supplementary material for: Effect of Moderate Consumption of Different Phenolic-Content Beers on the Human Gut Microbiota Composition: A Randomized Crossover Trial
Source: MDPI journal article supplement (doi:10.3390/antiox11040696), 2022-03-31
Supplement: s1 [file s1]

**Supplemental Table S2.** Metacyc pathways evaluated after each intervention period

| <b>Abbreviation</b>  | <b>Pathway</b>                                                                    |
|----------------------|-----------------------------------------------------------------------------------|
| P101-PWY             | ectoine biosynthesis                                                              |
| POLYAMSYN-PWY        | superpathway of polyamine biosynthesis I                                          |
| HOMOSER-METSYN-PWY   | L-methionine biosynthesis I                                                       |
| PWY-181              | photorespiration                                                                  |
| PWY-5347             | superpathway of L-methionine biosynthesis (transsulfuration)                      |
| PWY-7528             | L-methionine salvage cycle I (bacteria and plants)                                |
| PWY-7315             | dTDP-N-acetylthomosamine biosynthesis                                             |
| PWY-7347             | sucrose biosynthesis III                                                          |
| SUCSYN-PWY           | sucrose biosynthesis I (from photosynthesis)                                      |
| P241-PWY             | coenzyme B biosynthesis                                                           |
| P261-PWY             | coenzyme M biosynthesis I                                                         |
| PWY-5855             | ubiquinol-7 biosynthesis (early decarboxylation)                                  |
| PWY-5856             | ubiquinol-9 biosynthesis (early decarboxylation)                                  |
| PWY-5857             | ubiquinol-10 biosynthesis (early decarboxylation)                                 |
| PWY-6708             | ubiquinol-8 biosynthesis (early decarboxylation)                                  |
| UBISYN-PWY           | superpathway of ubiquinol-8 biosynthesis (early decarboxylation)                  |
| PWY-6151             | S-adenosyl-L-methionine salvage I                                                 |
| 1CMET2-PWY           | folate transformations III (E. coli)                                              |
| PWY-1422             | vitamin E biosynthesis (tocopherols)                                              |
| PWY-6891             | thiazole component of thiamine diphosphate biosynthesis II                        |
| PWY-7094             | fatty acid salvage                                                                |
| PPGPPMET-PWY         | ppGpp metabolism                                                                  |
| PWY-7234             | inosine-5'-phosphate biosynthesis III                                             |
| PWY-7184             | pyrimidine deoxyribonucleotides de novo biosynthesis I                            |
| PWY-7211             | superpathway of pyrimidine deoxyribonucleotides <i>de novo</i> biosynthesis       |
| PWY-6660             | 2-heptyl-3-hydroxy-4(1H)-quinolone biosynthesis                                   |
| PWY-6662             | superpathway of quinolone and alkylquinolone biosynthesis                         |
| PWY-7022             | paromamine biosynthesis II                                                        |
| PWY-5188             | tetrapyrrole biosynthesis I (from glutamate)                                      |
| PWY-5189             | tetrapyrrole biosynthesis II (from glycine)                                       |
| CHLOROPHYLL-SYN      | 3,8-divinyl-chlorophyllide <i>a</i> biosynthesis I (aerobic, light-dependent)     |
| HEME-BIOSYNTHESIS-II | heme b biosynthesis I (aerobic)                                                   |
| HEMESYN2-PWY         | heme b biosynthesis II (oxygen-independent)                                       |
| PWY-5531             | 3,8-divinyl-chlorophyllide <i>a</i> biosynthesis II (anaerobic)                   |
| PWY-7159             | 3,8-divinyl-chlorophyllide <i>a</i> biosynthesis III (aerobic, light independent) |

|                             |                                                                           |
|-----------------------------|---------------------------------------------------------------------------|
| PWY-5529                    | superpathway of bacteriochlorophyll a biosynthesis                        |
| PWY-5918                    | superpathway of heme b biosynthesis from glutamate                        |
| PWY-5920                    | superpathway of heme b biosynthesis from glycine                          |
| PWY0-1415                   | superpathway of heme b biosynthesis from uroporphyrinogen-III             |
| PWY-5705                    | allantoin degradation to glyoxylate III                                   |
| LEU-DEG2-PWY                | L-leucine degradation I                                                   |
| PWY-5028                    | L-histidine degradation II                                                |
| TYRFUMCAT-PWY               | L-tyrosine degradation I                                                  |
| PWY-6185                    | 4-methylcatechol degradation (ortho cleavage)                             |
| CATECHOL-ORTHO-CLEAVAGE-PWY | catechol degradation to &beta;-keto adipate                               |
| PWY-5415                    | catechol degradation I (meta-cleavage pathway)                            |
| PWY-5417                    | catechol degradation III (ortho-cleavage pathway)                         |
| PWY-5431                    | aromatic compounds degradation via &beta;-keto adipate                    |
| PWY-6957                    | mandelate degradation to acetyl-CoA                                       |
| PWY-5179                    | toluene degradation V (aerobic) (via toluene-cis-diol)                    |
| PWY-5180                    | toluene degradation I (aerobic) (via o-cresol)                            |
| P23-PWY                     | reductive TCA cycle I                                                     |
| PWY-5392                    | reductive TCA cycle II                                                    |
| PWY-6992                    | 1,5-anhydrofructose degradation                                           |
| NPGLUCAT-PWY                | Entner-Doudoroff pathway II (non-phosphorylative)                         |
| PWY-6713                    | L-rhamnose degradation II                                                 |
| PWY-6946                    | cholesterol degradation to androstenedione II (cholesterol dehydrogenase) |
| PWY-6641                    | superpathway of sulfolactate degradation                                  |
| SALVADEHYPOX-PWY            | adenosine nucleotides degradation II                                      |
| PWY-6731                    | starch degradation III                                                    |
| PWY-7046                    | 4-coumarate degradation (anaerobic)                                       |
| P562-PWY                    | <I>myo</I>-inositol degradation I                                         |
| PWY0-1261                   | anhydromuropeptides recycling I                                           |
| PWY-5741                    | ethylmalonyl-CoA pathway                                                  |
| PWY-6876                    | isopropanol biosynthesis (engineered)                                     |
| PWY-3781                    | aerobic respiration I (cytochrome c)                                      |
| FERMENTATION-PWY            | mixed acid fermentation                                                   |
| PWY-7254                    | TCA cycle VII (acetate-producers)                                         |
| MET-SAM-PWY                 | superpathway of S-adenosyl-L-methionine biosynthesis                      |
| PWY0-781                    | aspartate superpathway                                                    |
