# Supplementary material for: Effect of Moderate Consumption of Different Phenolic-Content Beers on the Human Gut Microbiota Composition: A Randomized Crossover Trial
Source: MDPI journal article supplement (doi:10.3390/antiox11040696), 2022-03-31
Supplement: s1 [file s1]

**Supplemental Table S1.** Dietary assessment according to total energy and macronutrients/fiber intake of healthy volunteers and participants with metabolic syndrome

|                                | Healthy volunteers |                             |                             |                  | Subjects with metabolic syndrome |                             |                             |                  | P     |       |
|--------------------------------|--------------------|-----------------------------|-----------------------------|------------------|----------------------------------|-----------------------------|-----------------------------|------------------|-------|-------|
|                                | Baseline           | Alcohol-free                | Lager                       | Dark             | Baseline                         | Alcohol-free                | Lager                       | Dark             | Group | Beer  |
| <b>Total energy (kcal d-1)</b> | 1610.06 ± 291.55   | 1760.06 ± 666.04            | 1581.93 ± 222.39            | 1612.59 ± 283.25 | 1617.20 ± 549.32                 | 1585.49 ± 465.71            | 1462.45 ± 378.86            | 1629.25 ± 468.66 | 0.653 | 0.685 |
| <b>Proteins (g d-1)</b>        | 65.68 ± 15.21      | 85.29 ± 61.13               | 69.71 ± 9.65                | 66.71 ± 15.79    | 70.96 ± 33.95                    | 75.77 ± 17.63               | 70.32 ± 17.70               | 68.21 ± 13.90    | 0.943 | 0.353 |
| <b>Lipids (g d-1)</b>          | 81.71 ± 24.43      | 84.96 ± 33.79               | 82.47 ± 15.23               | 81.28 ± 23.49    | 82.42 ± 38.71                    | 85.46 ± 28.68               | 79.65 ± 23.27               | 88.60 ± 32.72    | 0.938 | 0.978 |
| <b>Carbohydrates (g d-1)</b>   | 155.30 ± 26.83     | 162.97 ± 48.59              | 140.89 ± 35.95              | 154.93 ± 24.99   | 147.85 ± 44.81                   | 127.66 ± 44.34              | 120.57 ± 29.30              | 138.13 ± 37.36   | 0.063 | 0.271 |
| <b>Simple sugars (g d-1)</b>   | 68.26 ± 24.38      | 66.56 ± 28.27 <sup>\$</sup> | 55.37 ± 12.03 <sup>\$</sup> | 60.87 ± 17.55    | 52.68 ± 30.37                    | 36.97 ± 12.31 <sup>\$</sup> | 33.07 ± 16.07 <sup>\$</sup> | 43.36 ± 27.22    | 0.006 | 0.129 |
| <b>Dietetic fiber (g d-1)</b>  | 16.64 ± 6.40       | 16.41 ± 11.87               | 12.71 ± 3.57                | 14.80 ± 6.18     | 14.59 ± 4.97                     | 15.67 ± 9.55                | 12.96 ± 5.54                | 14.46 ± 6.40     | 0.659 | 0.448 |

Values are presented as mean ±SD (standard deviation).<sup>\$</sup> Statistically significant differences (P<0.05) between groups (healthy volunteers and subjects with metabolic syndrome) according to each study intervention.
