# Supplementary material for: Effect of Moderate Consumption of Different Phenolic-Content Beers on the Human Gut Microbiota Composition: A Randomized Crossover Trial
Source: MDPI journal article supplement (doi:10.3390/antiox11040696), 2022-03-31
Supplement: s1 [file s1]

**Supplemental Table S3.** Common and different Metacyc pathways in the evaluated intervention periods.

|                                                                                                |
|------------------------------------------------------------------------------------------------|
| <b>5 common elements in "Dark", "Lager" and "W-alc":</b>                                       |
| CHLOROPHYLL-SYN: 3,8-divinyl-chlorophyllide <i>a</i> biosynthesis I (aerobic, light-dependent) |
| P562-PWY: <i>myo</i> -inositol degradation I                                                   |
| PWY-5531: 3,8-divinyl-chlorophyllide <i>a</i> biosynthesis II (anaerobic)                      |
| PWY-7159: 3,8-divinyl-chlorophyllide <i>a</i> biosynthesis III (aerobic, light independent)    |
| PWY-7234: inosine-5'-phosphate biosynthesis III                                                |
|                                                                                                |
| <b>10 common elements in "Dark" and "Lager":</b>                                               |
| HEME-BIOSYNTHESIS-II: heme <i>b</i> biosynthesis I (aerobic)                                   |
| HEMESYN2-PWY: heme <i>b</i> biosynthesis II (oxygen-independent)                               |
| PWY-5529: superpathway of bacteriochlorophyll <i>a</i> biosynthesis                            |
| PWY-5918: superpathway of heme <i>b</i> biosynthesis from glutamate                            |
| PWY-5920: superpathway of heme <i>b</i> biosynthesis from glycine                              |
| PWY-7254: TCA cycle VII (acetate-producers)                                                    |
| PWY-7347: sucrose biosynthesis III                                                             |
| PWY-7528: L-methionine salvage cycle I (bacteria and plants)                                   |
| PWY0-1261: anhydromuropeptides recycling I                                                     |
| SUCSYN-PWY: sucrose biosynthesis I (from photosynthesis)                                       |
|                                                                                                |
| <b>1 common element in "Lager" and "W-alc":</b>                                                |
| PWY-6731: starch degradation III                                                               |
|                                                                                                |
| <b>3 elements included exclusively in "Lager":</b>                                             |
| PWY-1422: vitamin E biosynthesis (tocopherols)                                                 |
| PWY-7022: paromamine biosynthesis II                                                           |
| PWY-7046: 4-coumarate degradation (anaerobic)                                                  |
|                                                                                                |
| <b>9 elements included exclusively in "W-alc":</b>                                             |
| 1CMET2-PWY: folate transformations III ( <i>E. coli</i> )                                      |
| FERMENTATION-PWY: mixed acid fermentation                                                      |
| HOMOSER-METSYN-PWY: L-methionine biosynthesis I                                                |
| MET-SAM-PWY: superpathway of S-adenosyl-L-methionine biosynthesis                              |
| NPGLUCAT-PWY: Entner-Doudoroff pathway II (non-phosphorylative)                                |
| PWY-5347: superpathway of L-methionine biosynthesis (transsulfuration)                         |
| PWY-6151: S-adenosyl-L-methionine salvage I                                                    |
| PWY-6891: thiazole component of thiamine diphosphate biosynthesis II                           |
| PWY-7315: dTDP-N-acetylthomosamine biosynthesis                                                |
|                                                                                                |
| <b>45 elements included exclusively in "Dark":</b>                                             |

|                                                                                       |
|---------------------------------------------------------------------------------------|
| ARG+POLYAMINE-SYN: superpathway of arginine and polyamine biosynthesis                |
| ARGORNPROST-PWY: L-arginine degradation (Stickland reaction)                          |
| CATECHOL-ORTHO-CLEAVAGE-PWY: catechol degradation to $\beta$ -ketoadipate             |
| LEU-DEG2-PWY: L-leucine degradation I                                                 |
| P101-PWY: ectoine biosynthesis                                                        |
| P23-PWY: reductive TCA cycle I                                                        |
| P241-PWY: coenzyme B biosynthesis                                                     |
| P261-PWY: coenzyme M biosynthesis I                                                   |
| POLYAMSYN-PWY: superpathway of polyamine biosynthesis I                               |
| PPGPPMET-PWY: ppGpp metabolism                                                        |
| PWY-181: photorespiration                                                             |
| PWY-3781: aerobic respiration I (cytochrome c)                                        |
| PWY-5028: L-histidine degradation II                                                  |
| PWY-5179: toluene degradation V (aerobic) (via toluene-cis-diol)                      |
| PWY-5180: toluene degradation I (aerobic) (via o-cresol)                              |
| PWY-5182: toluene degradation II (aerobic) (via 4-methylcatechol)                     |
| PWY-5188: tetrapyrrole biosynthesis I (from glutamate)                                |
| PWY-5189: tetrapyrrole biosynthesis II (from glycine)                                 |
| PWY-5392: reductive TCA cycle II                                                      |
| PWY-5415: catechol degradation I (meta-cleavage pathway)                              |
| PWY-5417: catechol degradation III (ortho-cleavage pathway)                           |
| PWY-5431: aromatic compounds degradation via $\beta$ -ketoadipate                     |
| PWY-5705: allantoin degradation to glyoxylate III                                     |
| PWY-5741: ethylmalonyl-CoA pathway                                                    |
| PWY-5855: ubiquinol-7 biosynthesis (early decarboxylation)                            |
| PWY-5856: ubiquinol-9 biosynthesis (early decarboxylation)                            |
| PWY-5857: ubiquinol-10 biosynthesis (early decarboxylation)                           |
| PWY-6185: 4-methylcatechol degradation (ortho cleavage)                               |
| PWY-6641: superpathway of sulfolactate degradation                                    |
| PWY-6660: 2-heptyl-3-hydroxy-4(1H)-quinolone biosynthesis                             |
| PWY-6662: superpathway of quinolone and alkylquinolone biosynthesis                   |
| PWY-6708: ubiquinol-8 biosynthesis (early decarboxylation)                            |
| PWY-6713: L-rhamnose degradation II                                                   |
| PWY-6876: isopropanol biosynthesis (engineered)                                       |
| PWY-6946: cholesterol degradation to androstenedione II (cholesterol dehydrogenase)   |
| PWY-6957: mandelate degradation to acetyl-CoA                                         |
| PWY-6992: 1,5-anhydrofructose degradation                                             |
| PWY-7094: fatty acid salvage                                                          |
| PWY-7184: pyrimidine deoxyribonucleotides de novo biosynthesis I                      |
| PWY-7211: superpathway of pyrimidine deoxyribonucleotides <i>de novo</i> biosynthesis |
| PWY0-1415: superpathway of heme b biosynthesis from uroporphyrinogen-III              |

|                                                                              |
|------------------------------------------------------------------------------|
| PWY0-781: aspartate superpathway                                             |
| SALVADEHYPOX-PWY: adenosine nucleotides degradation II                       |
| TYRFUMCAT-PWY: L-tyrosine degradation I                                      |
| UBISYN-PWY: superpathway of ubiquinol-8 biosynthesis (early decarboxylation) |
